# Supplementary material for: Conformational changes underlying variation in the structural dynamics of materials confined at the nanometric scale
Source: Royal Society of Chemistry journal article supplement (doi:10.1039/c8cp06086j), 2018-01-01
Supplement: c8cp06086j1.pdf [file c8cp06086j1.pdf]

## Conformational changes underlying variation in the structural dynamics of the materials confined at the nanometric scale.

Aldona Minecka<sup>a</sup>, Ewa Kaminska<sup>a</sup>, Magdalena Tarnacka<sup>b,c</sup>, Agnieszka Talik<sup>b,c</sup>, Iwona Grudzka-Flak<sup>b,c</sup>, Kamila Wolnica<sup>b,c</sup>, Mateusz Dulski<sup>c,d</sup>, Kamil Kaminski<sup>b,c</sup>, Marian Paluch<sup>b,c</sup>

<sup>a</sup> Department of Pharmacognosy and Phytochemistry, Medical University of Silesia in Katowice, School of Pharmacy with the Division of Laboratory Medicine in Sosnowiec, Jagiellonska 4, 41-200 Sosnowiec, Poland

<sup>b</sup> Institute of Physics, University of Silesia, 75 Pulku Piechoty 1, 41-500 Chorzow, Poland;

<sup>c</sup> Silesian Center for Education and Interdisciplinary Research, 75 Pulku Piechoty 1a, 41-500 Chorzow, Poland

<sup>d</sup> Institute of Material Science, University of Silesia, 75 Pulku Piechoty 1a, 41-500 Chorzow, Poland

### EXPERIMENTAL SECTION AMPLIFICATION

#### Raman measurements details

All Raman data were manipulated by performing a baseline correction and cosmic ray removal. The difference Raman spectrum was obtained by mathematic calculation taking into account difference between the first spectrum obtained after sample quenching and last spectrum collected after sample equilibration. The spectrometer's monochromator was calibrated using the Raman scattering line of a silicon plate ( $520.7\text{ cm}^{-1}$ ).

#### Theoretical computations description in details

Quantum mechanical calculations were applied to resolve the problem of band assignments observed during the Raman experiment. The initial geometry of Ben-IBU in *cis*-configuration was optimized using the molecular modeling method implemented in the Gaussian09 software package.<sup>1</sup> Then, energy barriers for conformational motions of benzene ring at different torsion angles ( $\Phi$ ,  $\varphi$ ) were followed. The dihedral angle ( $\Phi$  or  $\varphi$ ) was changed

continuously by 10° in the whole range of 360°. Energy barriers were obtained by subtraction of all nonthermal energy (sum of electronic and zero-point vibrational energy) of the transition state from the nonthermal energy of minimum state. These calculations were performed using density functional theory (DFT) in the gas phase<sup>2,3,4</sup> at B3LYP functional<sup>5,6,7</sup> and split-valence 6-31+G(d, p) basis sets with diffuse *s* as well as *p* functions for nonhydrogen atoms due to the presence of lone pairs on oxygen. The optimized transition states (*cis*, *trans* and intermediate) were optimized by the use of eigenvector following method at the same level of theory and used as input files for vibrational harmonic calculations. All conformers had positive harmonic vibrations proving a true energy minimum.<sup>6</sup> Crucial is to note that the theoretical methods overestimate vibrational frequencies due to neglecting the anharmonicity, incomplete incorporation of the electron correlation and the use of finite basis sets in the theoretical treatment. Therefore, the spectra were adjusted by a scale factor of 0.967.<sup>8</sup> Theoretical Raman intensities ( $I_i$ ) were additionally obtained from the calculated Raman scattering activities ( $S_i$ ) taken into account experimental temperatures, based on the expression:

$$I_i = \frac{10^{-12}(\nu_0 - \nu_i)^4 S_i}{\nu_i B_i}, \quad (1)$$

where  $B_i$  is a temperature factor, which accounts for the intensity contribution of excited vibrational states and is represented by the Boltzmann distribution:

$$B_i = 1 - \exp\left[\frac{(-h\nu_i c)}{(kT)}\right], \quad (2)$$

where  $h$ ,  $k$ ,  $c$ , and  $T$  are Planck and Boltzmann constants, a speed of light and temperature in Kelvin, respectively;  $\nu_0$  is the frequency of the laser excitation line ( $\nu_0 = 1/\lambda_0$  where  $\lambda_0$  is the laser wavelength),  $\nu_i$  is the frequency of normal mode.<sup>9,10</sup>

## COMPREHENSIVE RAMAN SPECTRA ANALYSIS

The bands centered below  $1000\text{ cm}^{-1}$  ( $809, 834, 956\text{ cm}^{-1}$ ) are linked to the CH ring stretching, CC ring deformation, CC vibration within trimethyl moieties, as well as methyl deformation modes. Five bands located around  $1002, 1032, 1117, 1185, 1203\text{ cm}^{-1}$  result from the in-plane CC ring deformation (aryl and para-xylene),  $\text{CH}_3$  and  $\text{CH}_2$  deformation as well as in-plane CH ring bending modes. Low intense bands at  $1283, 1339, 1378, 1445\text{ cm}^{-1}$  originate from the CC ring stretching, in-plane CH ring bending, or  $\text{CH}_3$  and  $\text{CH}_2$  deformation. In turn, well-visible bands at  $1589$  and  $1616\text{ cm}^{-1}$  correspond to the vibrations involving the carbon and hydrogen atoms of the ring of Ben-IBU. Such bands are overlapping with bands originated from the vibration of the para-xylene ring. Finally, the low-intensity band at  $1735\text{ cm}^{-1}$  is associated with the vibration of the carboxylic C=O group, while the bands between  $2800$  and  $3100\text{ cm}^{-1}$  with the CH ring stretching at the aryl and para-xylene rings as well as symmetric and asymmetric stretching vibration of  $\nu(\text{CH}_2)$  and  $\nu(\text{CH}_3)$  groups.

## REFERENCES

- 
- <sup>1</sup> M. J. Frisch, G. W. Trucks, H. B. Schlegel, G. E. Scuseria, M. A. Robb, J. R. Cheeseman et al. *Gaussian 09*, Revision A.02; Gaussian Inc.: Wallingford CT, 2016.
  - <sup>2</sup> J. H. Warren, L. Radom, P. R. von Schleyer, J. Pople, *AB INITIO Molecular Orbital Theory*. John Wiley: New York, 1989.
  - <sup>3</sup> R. G. Parr, Y. Weitao, *Density-Functional Theory of Atoms and Molecules*; Oxford University Press: New York, 1994.
  - <sup>4</sup> J. F. Dobson, G. Vignale, M. P. Das, *Electronic Density Functional Theory: Recent Progress and New Directions*; Springer: New York, 1998.

---

<sup>5</sup> A. D. Becke, *Phys. Rev. A*, 1988, 38, 3098–3100.

<sup>6</sup> A. D. Becke, *J. Chem. Phys.*, 1993, 98, 5648–5652.

<sup>7</sup> C. Lee, W. Yang, R. G. Parr, *Phys. Rev. B Condens. Matter*, 1998, 37, 785–789.

<sup>8</sup> Y. Bouteiller, J. C. Gillet, G. Gregoire, J. P. Schermann, *J. Phys. Chem. A*, 2008, 112 (46), 11656–11660.

<sup>9</sup> D. Michalska, R. Wysockiński, *Chem. Phys. Lett.*, 2005, 403 (1-3), 211–217.

<sup>10</sup> E. C. Le Ru, P. G. Etchegoin, *Principles of Surface-enhanced Raman Spectroscopy and Related Plasmonic Effects*, Elsevier Science: Amsterdam, 2009.
